# Supplementary material for: Selection of the Most Informative Wavenumbers to Improve Prediction Accuracy of Milk Fatty Acid Profile Based on Milk Mid-Infrared Spectra Data
Source: Preprints.org preprint supplement (doi:10.20944/preprints202310.1324.v1), 2023-10-20
Supplement: Supplementary file 1 [file Supplementary Figure 1.docx]

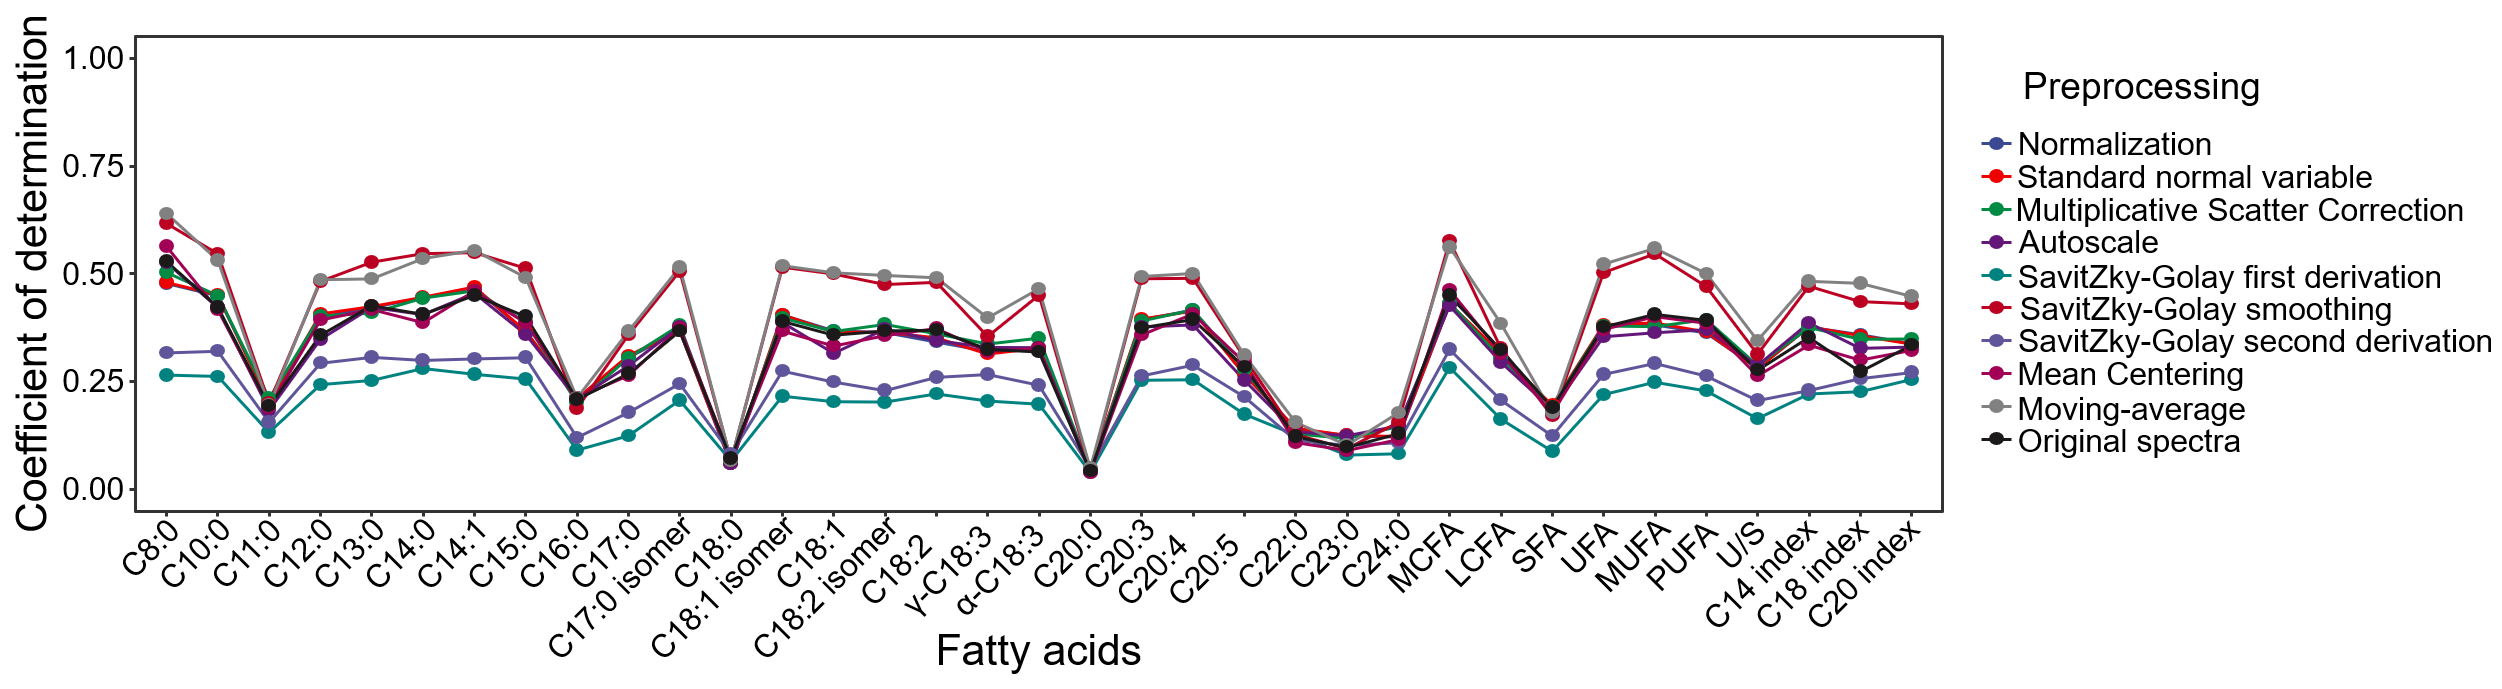


**Supplementary Figure 1.** A comparison of coefficient of determination with different preprocessing for milk mid-infrared spectra based on model that explanatory variable only included milk mid-infrared spectra (model 3).
