# Supplementary material for: Selection of the Most Informative Wavenumbers to Improve Prediction Accuracy of Milk Fatty Acid Profile Based on Milk Mid-Infrared Spectra Data
Source: Preprints.org preprint supplement (doi:10.20944/preprints202310.1324.v1), 2023-10-20
Supplement: Supplementary file 2 [file Supplementary Figure 2.docx]

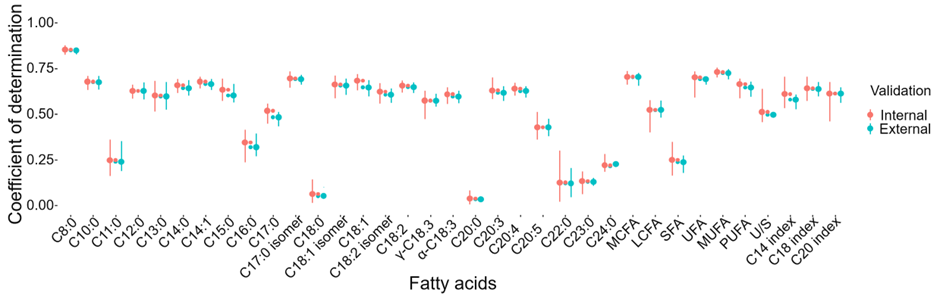


**Supplementary Figure 2.** Description of coefficient of determination in internal and external validations with model 4.
